# Supplementary material for: Study on the Preparation and Conjugation Mechanism of the Phosvitin-Gallic Acid Complex with an Antioxidant and Emulsifying Capability
Source: MDPI journal article supplement (doi:10.3390/polym11091464), 2019-09-07
Supplement: s1 [file s1]

## Supplementary Materials

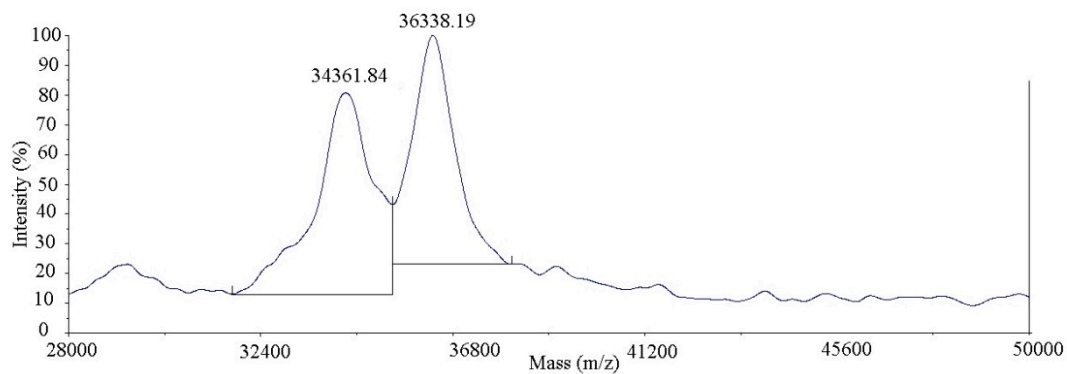

S 1. MALDI-TOF-MS analysis of Pv.

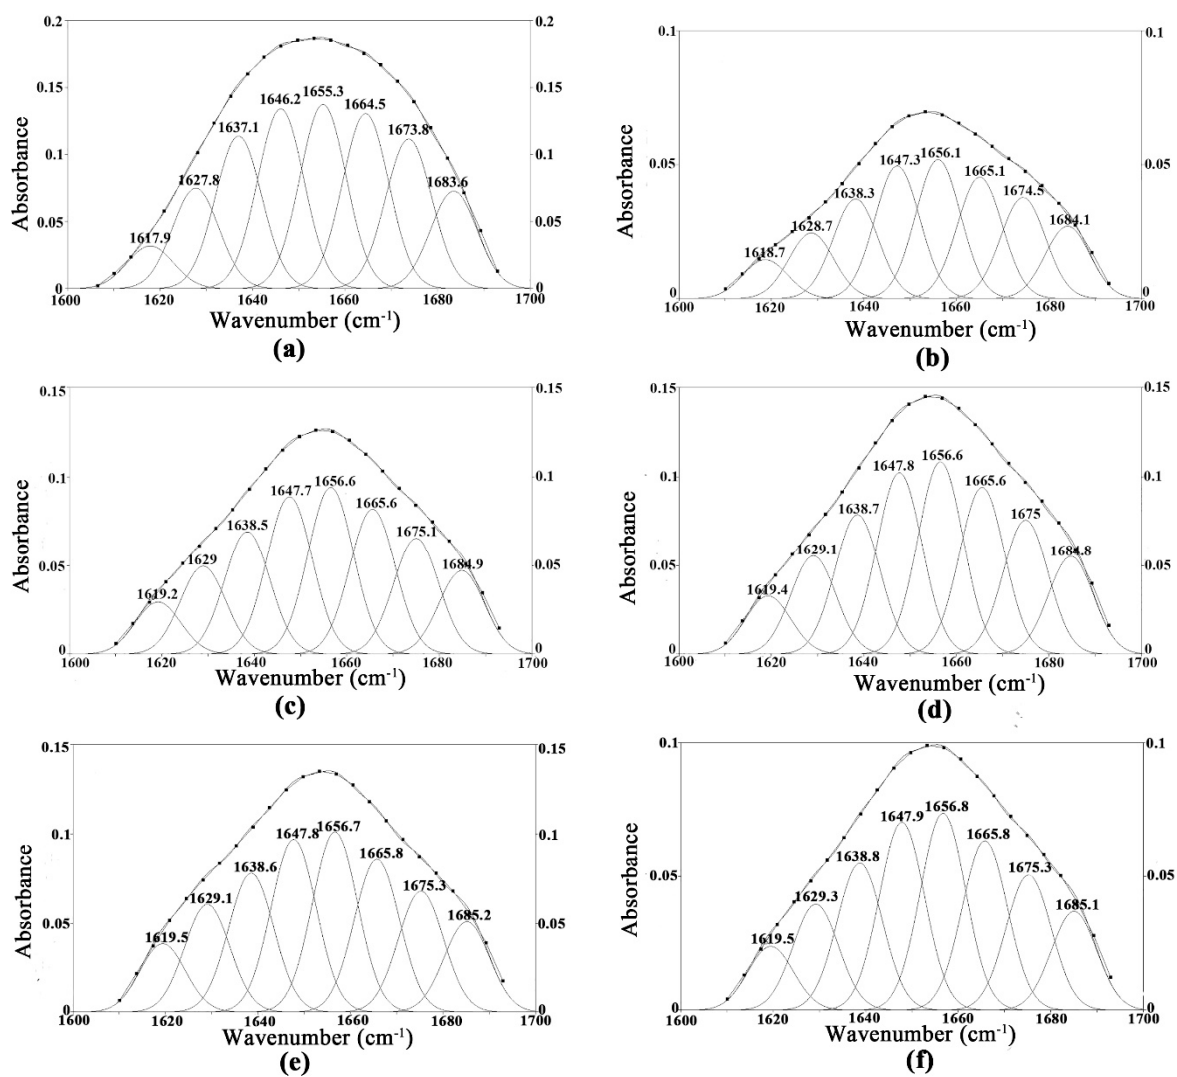

S 2. Second-derivative FTIR spectra in the amide I region and Gaussian curve fitting. (a) Pv; (b) Za; (c) Zb; (d) Zc; (e) Zd; (f) Ze.
